# Supplementary material for: Brønsted acidic ionic liquids for cellulose hydrolysis in an aqueous medium: structural effects on acidity and glucose yield
Source: Royal Society of Chemistry journal article supplement (doi:10.1039/c8ra01950a), 2018-01-01
Supplement: c8ra01950a1.pdf [file c8ra01950a1.pdf]

Electronic Supplementary Information (ESI)

## **Brønsted acidic ionic liquids for cellulose hydrolysis in aqueous medium: Structural effects on acidity and glucose yield**

Shiori Suzuki,<sup>#</sup> Yuko Takeoka, Masahiro Rikukawa and Masahiro Yoshizawa–Fujita\*

*Department of Materials and Life Sciences, Sophia University, 7-1 Kioi-cho, Chiyoda-ku, Tokyo 102-8554, Japan. E-mail\*: [masahi-f@sophia.ac.jp](mailto:masahi-f@sophia.ac.jp)*

*<sup>#</sup> Now at Faculty of Natural System, Institute of Science and Engineering, Kanazawa University, Kakuma-machi, Kanazawa 920-1192, Japan.*

The file includes: Supporting Fig. S1–S3 and Table S1–S2

## Electronic Supplementary Information (ESI)

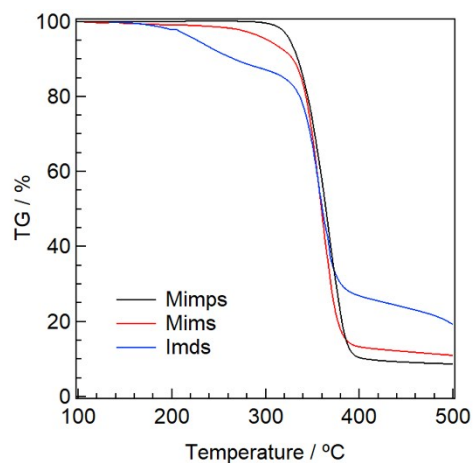

**Fig. S1** TG curves of zwitterions.

- Instrument: TG-DTA 7200  
(Hitachi High-Technologies, Co. Ltd.)
- Apparatus: open-type  
aluminum pan
- Sample loading: 10 mg
- Heating rate: 10 °C min<sup>-1</sup>
- N<sub>2</sub> flow: 200 mL min<sup>-1</sup>

**Table S1** Thermal property of zwitterions

| Zwitterion <sup>a</sup> | $T_{d-5\%}$ <sup>b</sup> / °C |
|-------------------------|-------------------------------|
| Mimps                   | 326                           |
| Mims                    | 302                           |
| Imds                    | 226                           |

<sup>a</sup> Prior to TG measurement, each zwitterion was dried at 120°C for 1 h under N<sub>2</sub>.

<sup>b</sup>  $T_{d-5\%}$ : 5% weight loss temperature.

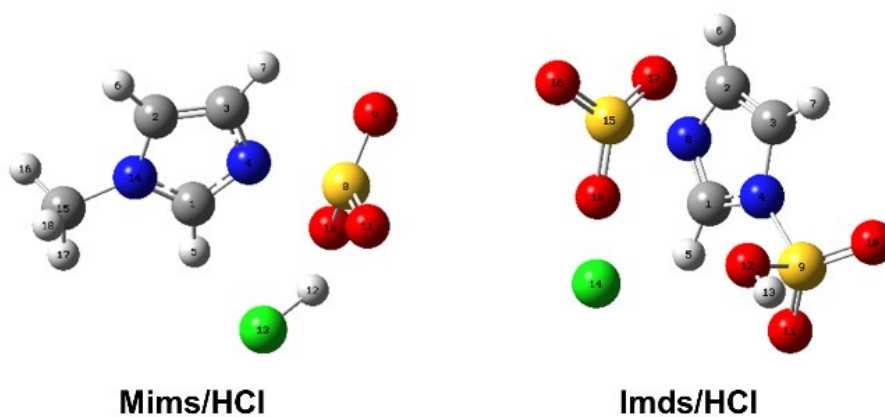

**Fig. S2** Optimized molecular structures of BAILs with mono- or disulfuric acid groups using B3LYP/6-311G++(d, p).

## Electronic Supplementary Information (ESI)

**Table S2** Residual amount of residue after cellulose hydrolysis (160 °C, 15 min) in 1 M BAILs aqueous solution

| Zw <sup>a</sup> | HX <sup>b</sup>                    | Glucose yield / % | Residue <sup>c</sup> / wt.% |
|-----------------|------------------------------------|-------------------|-----------------------------|
| Mim<br>ps       | H <sub>2</sub> S<br>O <sub>4</sub> | 32.3±2.2          | 5.6                         |
| Bimp<br>s       |                                    | 30.7±2.2          | 19                          |
| Oimp<br>s       |                                    | 36.3±3.8          | 21                          |
| -----           |                                    |                   |                             |
| Mim<br>ps       | HCl                                | 23.7±0.3          | 24                          |
| Bimp<br>s       |                                    | 26.0±1.5          | 30                          |
| Oimp<br>s       |                                    | 27.7±1.2          | 26                          |

<sup>a</sup> Zw: zwitterion. <sup>b</sup> HX: kinds of acid used to prepare BAILs called as Zw/HX; X is corresponded to anion species. <sup>c</sup> Represented as wt.% to the starting weight of cellulose (10 mg).

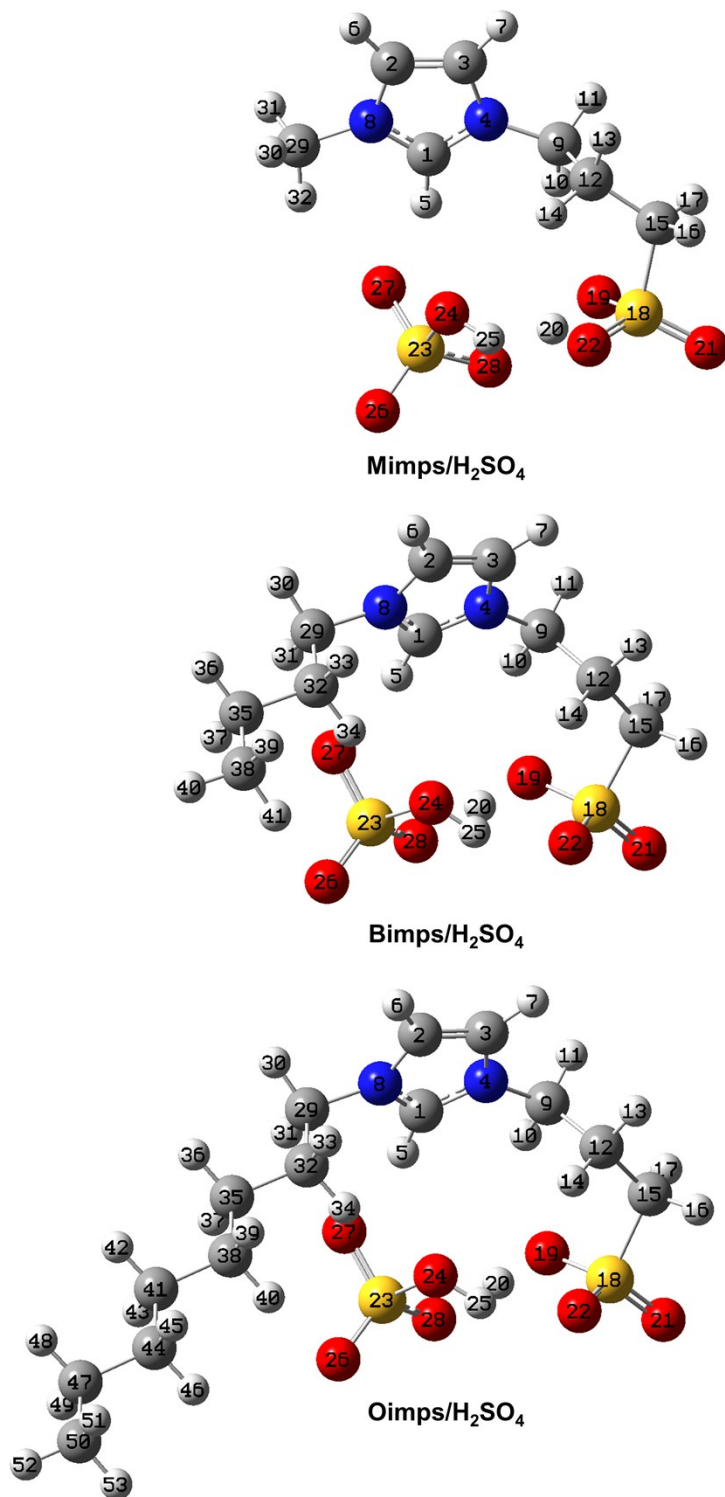

Fig. S3 (1) Optimized molecular structures of BAILs with HSO<sub>4</sub> anion using B3LYP/6-311G++(d, p).

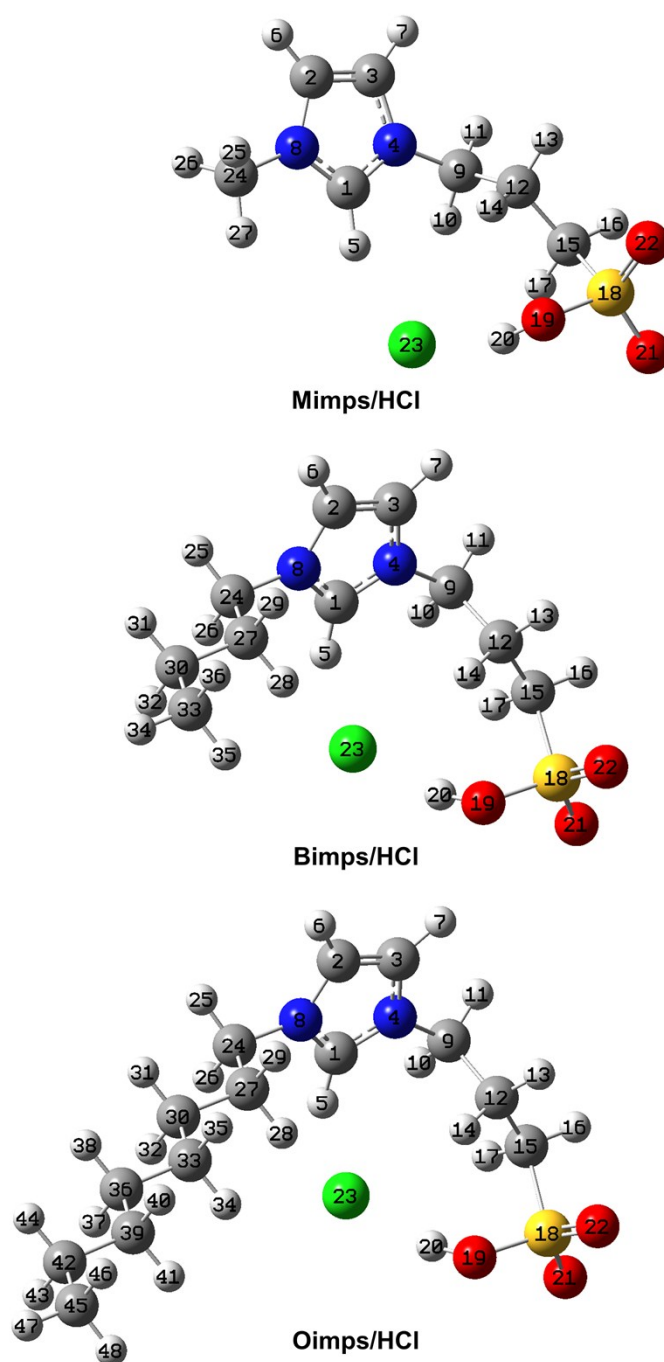

Fig. S3 (2) Optimized molecular structures of BAILs with Cl anion using B3LYP/6-311G++(d, p).

Electronic Supplementary Information (ESI)

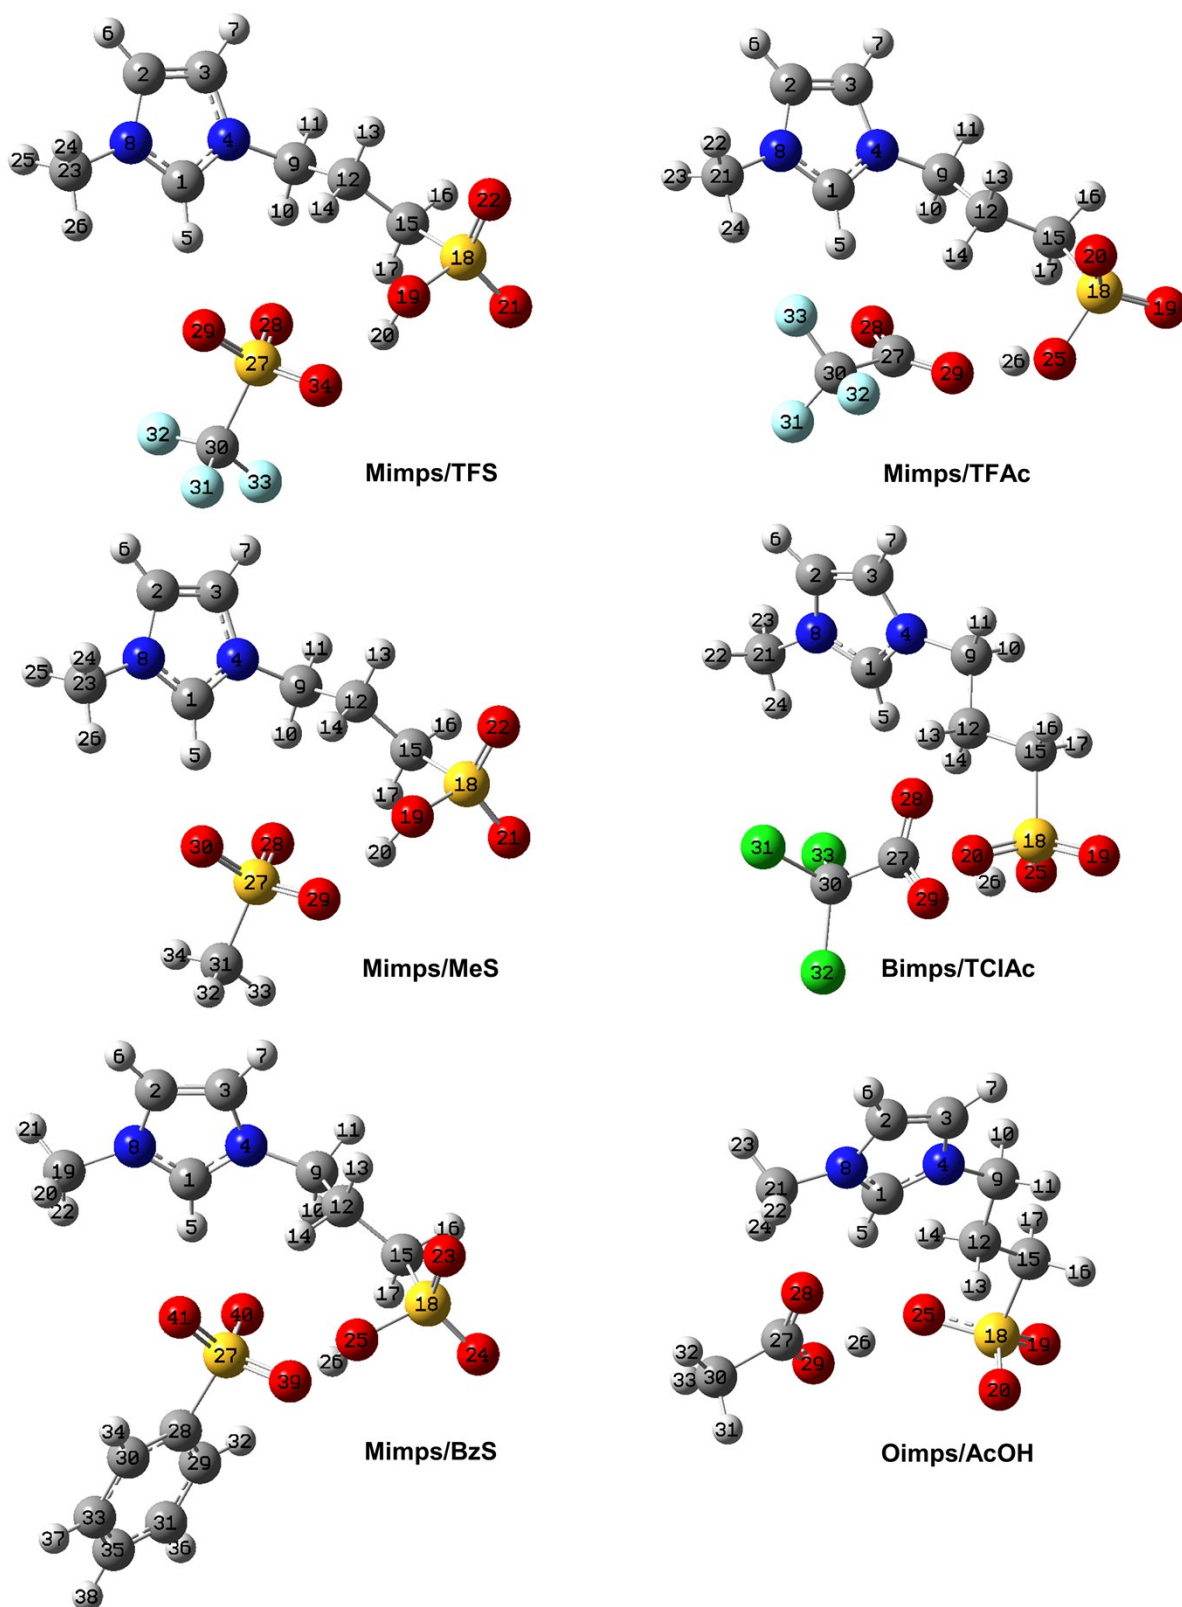

**Fig. S3 (3)** Optimized molecular structures of BAILs with sulfonic acid anion or carboxylic acid anion using B3LYP/6-311G++(d, p).

Electronic Supplementary Information (ESI)

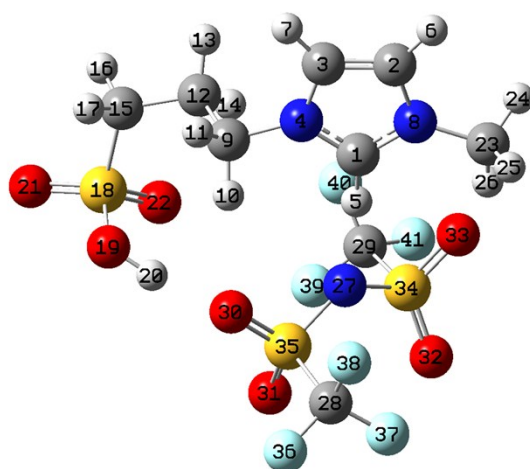

Mimps/HTFSI

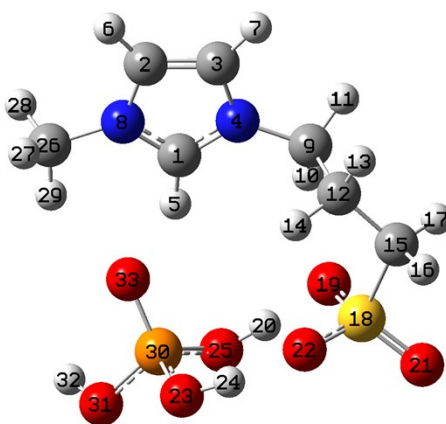

Mimps/H<sub>3</sub>PO<sub>4</sub>

**Fig. S3 (4)** Optimized molecular structures of BAILs with TFSI anion or phosphoric acid anion using B3LYP/6-311G++(d, p).
